# Supplementary material
Source: Springer Nature journal article supplement (https://www.springermedizin.de/resource/supplementary/12936_2009_1189_MOESM2_ESM.pdf/9549180)
Supplement: MOESM2 [file 9549180]

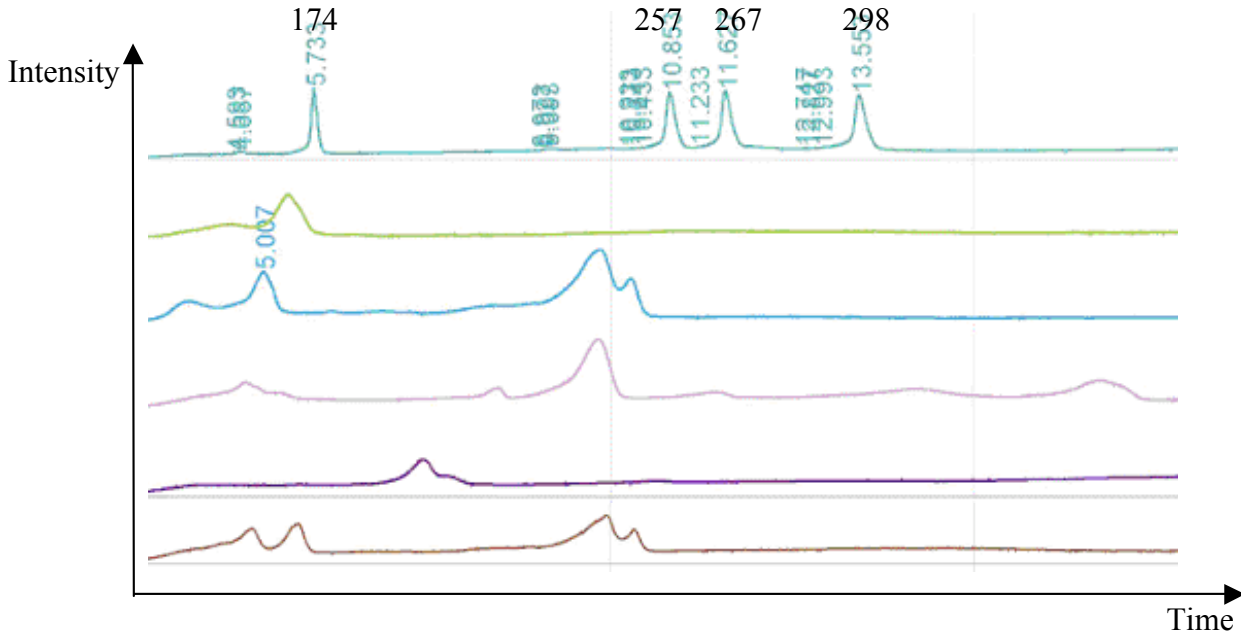

Wave DNA Sizing Standard (bp)

*Plasmodium falciparum*

*Plasmodium vivax* or *Plasmodium knowlesi*

*Plasmodium malariae*

*Plasmodium ovale*

Mix of *P. falciparum* and *P. vivax*, (mix of PCR products obtained from two control DNA samples).
